# Supplementary material for: Temperament Traits and Chronic Pain: The Association of Harm Avoidance and Pain-Related Anxiety
Source: PLoS One. 2012 Oct 25;7(10):e45672. doi: 10.1371/journal.pone.0045672 (PMC3485083; doi:10.1371/journal.pone.0045672)
Supplement: Dataset S1 — The data for pain intensity, pain-related anxiety, and harm avoidance scores of the chronic pain patients. (XLS) [file pone.0045672.s001.xls]

## Sheet: Plos
Gender	PainVAS	SUMPASS	Fearfulness	Escapeavoidance	cognitiveanxiety	physiologicalanxiety	HAscore	HA1SUM	HA2SUM	HA3SUM	HA4SUM
0	8.5	87	21	21	23	22	14	3	1	1	9
1	4.8	48	15	10	21	2	15	6	2	0	7
0	9.2	22	3	7	7	5	5	1	0	1	3
1	6.5	62	12	19	24	7	17	5	4	0	8
1	8.9	43	9	13	14	7	24	4	7	6	7
0	7.7	42	10	11	14	7	18	6	4	2	6
0	9.8	26	7	11	7	1	17	6	3	1	7
1	2.8	24	1	14	7	2	11	1	3	1	6
1	3.2	70	14	22	20	14	17	7	1	2	7
1	1.1	48	9	14	14	11	13	4	1	2	6
1	8.5						19	3	6	6	4
1	4.2	52	10	13	19	10	23	7	5	2	9
0	7.1	23	6	3	11	3	9	3	3	2	1
1	6.2	21	2	8	10	1	12	4	3	2	3
1	7.9	59	13	15	17	14	19	4	4	5	6
1	7	53	9	13	20	11	29	8	7	7	7
0	7.8	44	7	9	15	13	17	5	3	3	6
1	7.9	34	8	4	16	6	5	2	1	0	2
1	4.7	24	11	2	10	1	21	8	5	3	5
1	5	46	6	13	18	9	14	4	3	3	4
1	2.1	51	11	15	16	9	25	8	7	3	7
1	6	43	3	13	17	10	12	2	3	2	5
0	5.6	40	4	15	17	4	20	5	4	3	8
1	8.8	28	8	9	7	4	21	3	6	5	7
1		57	15	19	12	11	26	7	7	7	5
1	2.1	55	15	15	20	5	12	4	1	1	6
1	6.5	23	3	4	11	5	12	4	2	1	5
0	9.9	56	9	18	13	16	19	4	4	3	8
1	6.1	46	11	12	13	10	12	2	5	0	5
0	5	48	9	13	16	10	8	1	2	0	5
1	7.8	64	17	16	21	10	34	10	7	8	9
1	3.6	55	7	17	22	9	9	2	2	2	3
1	7.9	59	15	15	15	14	19	6	4	3	6
1	4.8	54	23	12	18	1		7		4	3
0	6.8	24	6	5	4	9	20	7	3	5	5
0		67	18	12	21	16	12	5	2	0	5
0	5.6	35	7	8	13	7	17	5	4	2	6
1	8.3	36	8	7	11	10	6	3	2	0	1
1	7.6	64	17	21	17	9	25	6	6	5	8
1	5	29	9	7	11	2	15	4	5	1	5
0	8	59	13	14	18	14	19	4	6	5	4
1	8	95	21	24	25	25	12	3	3	0	6
1	6.9	42	9	9	12	12	18	8	4	2	4
1	5	41	9	11	10	11	18	5	4	3	6
0	7.8	40	7	9	12	12	21	7	5	2	7
1	7.5	59	14	16	19	10	12	4	0	2	6
0	5	16	4	6	6	0	16	3	4	5	4
0	4	23	3	7	11	2	20	5	4	3	8
1	5	57	15	10	18	14	24	7	3	6	8
0	5.7	29	5	5	8	11	16	5	3	6	2
1	0	73	16	23	24	10	10	3	3	0	4
1	2.8	74	17	19	24	14	9	4	2	0	3
0	7.8	53	9	17	20	7	26	6	5	8	7
0	5	69	16	17	20	16	24	6	6	5	7
1	4	48	10	13	17	8	9	4	1	0	4
0	5.1	60	17	21	11	11	13	5	1	0	7
0	3.5	12	4	2	6	0	10	2	1	3	4
1	3	61	11	15	18	17	32	10	6	8	8
1	6	26	8	8	8	2	9	2	4	0	3
1	7.7	42	7	8	13	14	30	9	7	6	8
1	7.8	65	17	9	21	18	25	9	3	4	9
1	5	45	4	16	18	7	15	4	2	4	5
1	1.1	51	13	14	19	5	20	5	4	6	5
1	6.8	80	19	22	19	20	24	7	4	5	8
1	6	50	13	13	15	9	26	9	6	5	6
1	6	36	7	12	12	5	13	3	4	2	4
0	7	62	15	16	21	10	28	10	5	5	8
0	6	53	7	16	15	15	16	5	4	0	7
0	5.5	53	9	16	17	11	25	7	4	6	8
1	6.5	44	7	13	12	12	13	3	4	1	5
1	8	34	8	8	13	5	19	5	4	5	5
1	6.4	34	4	7	19	4	16	3	2	5	6
0	8.3	51	11	15	17	8	21	4	6	6	5
0	6.5	72	17	18	19	18	31	9	7	6	9
1	7	57	13	14	14	16	15	3	4	2	6
0	9	78	20	20	20	18	19	4	2	4	9
1	5.5	21	2	4	8	7	10	2	3	2	3
0	4	58	16	15	18	9	5	2	1	0	2
1	6	8	1	3	4	0	15	5	4	4	2
1	6.5	53	7	14	23	9	9	2	1	0	6
0	4	26	5	11	7	3	13	3	6	1	3
0	4	60	13	16	21	10	5	2	1	2	0
0	8	77	20	23	19	15	32	10	7	7	8
0	8	46	5	13	17	11	5	1	2	0	2
1	3.5	51	10	11	13	17	19	6	2	2	9
0	4.5	60	18	15	17	10	17	7	4	2	4
1	4	25	4	3	13	5	16	5	5	2	4
1	2	73	22	17	21	13	22	5	4	5	8
1	3	36	8	9	15	4	8	2	2	2	2
0	6	32	5	12	10	5	19	2	5	5	7
0	8	57	11	14	21	11	10	1	2	1	6
0	9	60	16	15	22	7	15	3	2	3	7
1	5	29	9	3	15	2	19	5	6	2	6
0	4.5	61	14	12	22	13	17	2	6	1	8
1	7.5	46	10	12	17	7	23	6	6	4	7
1	3.5	24	3	7	14	0	2	2	0	0	0
1	6.7	59	13	18	15	13	27	8	6	5	8
1	8	75	19	18	22	16	27	11	6	3	7
1	7.5	63	15	14	19	15	22	8	3	3	8
0	8.3	21	0	8	9	4	14	1	6	3	4
